# Supplementary material for: Mitigation of ionospheric signatures in Swarm GPS gravity field estimation using weighting strategies
Source: Copernicus journal article supplement (doi:10.5194/angeo-2018-91), 2018-08-17
Supplement: Supplementary file [file angeo-2018-91-AC1-supplement.pdf]

# Mitigation of ionospheric signatures in Swarm GPS gravity field estimation using weighting strategies. Supplement for RC1

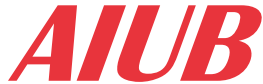

Astronomical Institut, University of Bern

Lucas Schreiter, Veerle Sterken, Daniel Arnold, Adrian Jäggi

Bern, 21. Sept. 2018

# Geoid high differences wrt. to a static/monthly GRACE gravity field

Static AIUB-GRACE03S

Original, 15/03

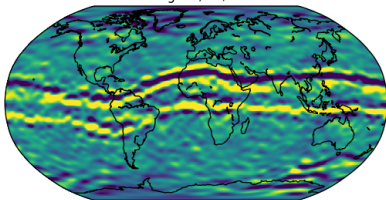

-0.04 -0.02 0.00 0.02 0.04  
Geoid height differences [m]

Monthly JPL-RL06 GRACE

Original, 15/03

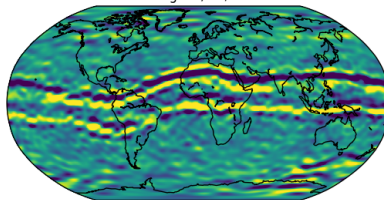

-0.04 -0.02 0.00 0.02 0.04  
Geoid height differences [m]

Std. scr., 15/03

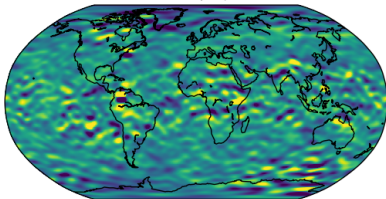

-0.04 -0.02 0.00 0.02 0.04  
Geoid height differences [m]

Std. scr., 15/03

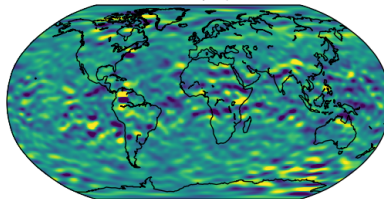

-0.04 -0.02 0.00 0.02 0.04  
Geoid height differences [m]

# Geoid high differences wrt. to a static/monthly GRACE gravity field

## Static AIUB-GRACE03S

1st der. (2cm/s), 15/03

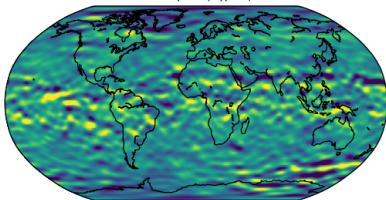

-0.04      -0.02      0.00      0.02      0.04  
Geoid height differences [m]

## Monthly JPL-RL06 GRACE

1st der., 15/03

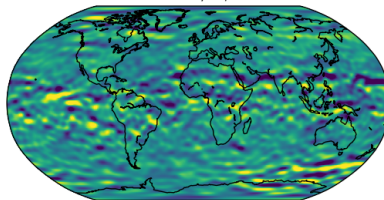

-0.04      -0.02      0.00      0.02      0.04  
Geoid height differences [m]

2nd der., eq., 15/03

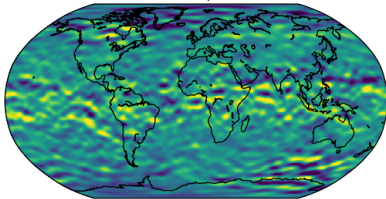

-0.04      -0.02      0.00      0.02      0.04  
Geoid height differences [m]

2nd der. (eq.), 15/03

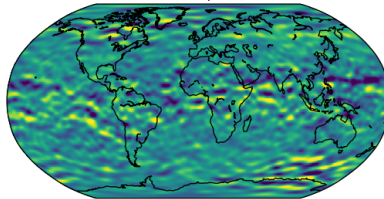

-0.04      -0.02      0.00      0.02      0.04  
Geoid height differences [m]

# Geoid high differences wrt. to a static/monthly GRACE gravity field

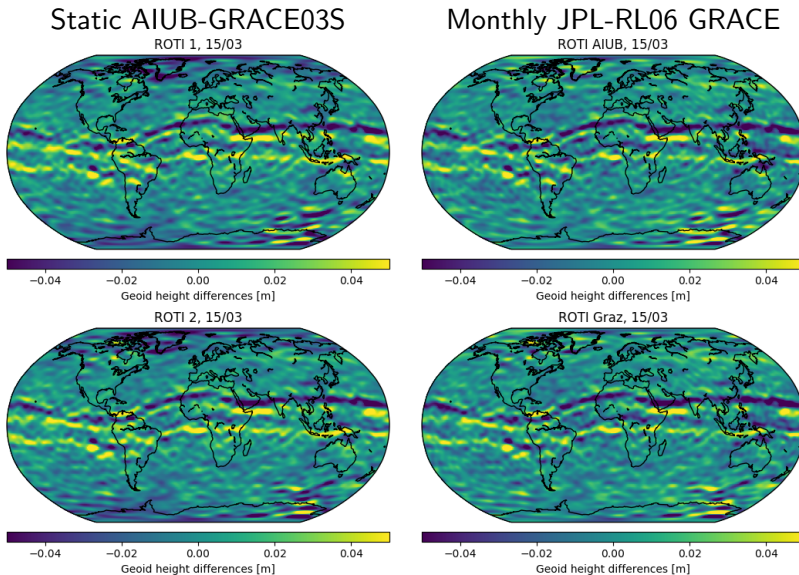

# Geoid high differences wrt. to a static/monthly GRACE gravity field

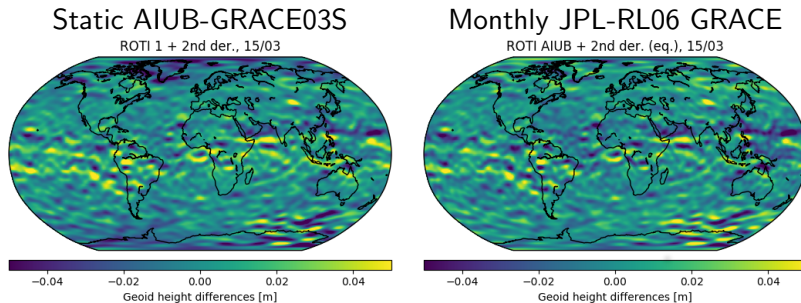

# Difference Degree Amplitudes for a disturbed month(15/03)

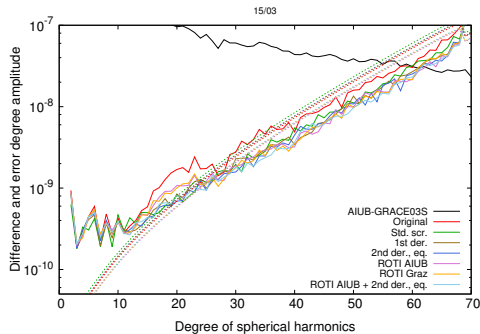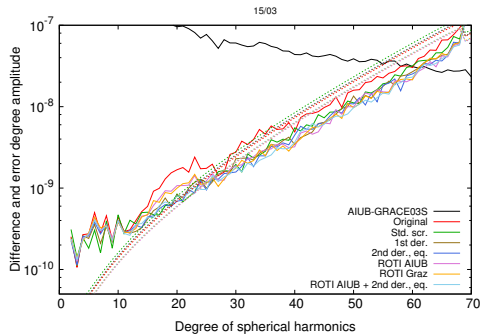

# Difference Degree Amplitudes for a clan month(16/06)

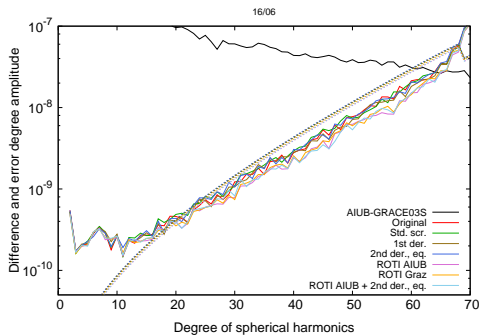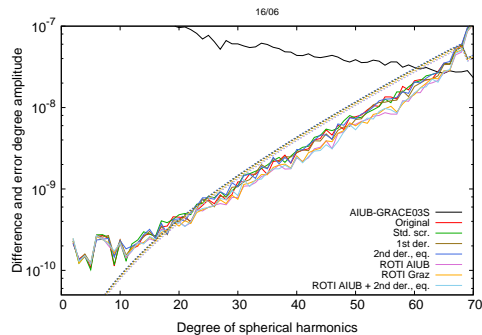

# wStd and geoid RMS for a disturbed month (15/03)

| Test                | wStd(static)<br>[mm] | RMS(static)<br>[mm] | wStd(monthly)<br>[mm] | RMS(monthly)<br>[mm] |
|---------------------|----------------------|---------------------|-----------------------|----------------------|
| Original            | 99.4637              | 21.9728             | 101.2496              | 21.6252              |
| Std. Screening      | 60.1174              | 13.7982             | 63.7141               | 13.6113              |
| D1-weighting        | 64.3574              | 13.5479             | 67.3917               | 13.1235              |
| D2(eq.)-weighting   | 59.0403              | 12.9049             | 62.1005               | 12.4059              |
| ROTI-AIUB           | 61.3036              | 14.2885             | 64.4740               | 13.7952              |
| ROTI-Graz           | 58.4906              | 14.0679             | 61.7050               | 13.5869              |
| D2(eq.) + ROTI-AIUB | 51.4554              | 12.4784             | 55.3291               | 12.0068              |



# wStd and geoid RMS for a clean month (16/06)

---

| Test                | wStd(static)<br>[mm] | RMS(static)<br>[mm] | wStd(monthly)<br>[mm] | RMS(monthly)<br>[mm] |
|---------------------|----------------------|---------------------|-----------------------|----------------------|
| Original            | 40.5898              | 8.6027              | 45.2672               | 8.2871               |
| Std. Screening      | 42.2302              | 9.0698              | 46.6446               | 8.7910               |
| D1-weighting        | 42.1095              | 8.5473              | 46.6458               | 8.2511               |
| D2(eq.)-weighting   | 41.9492              | 8.9132              | 46.4572               | 8.6092               |
| ROTI-AIUB           | 31.4149              | 7.2683              | 37.4209               | 6.9510               |
| ROTI-Graz           | 33.4430              | 7.4151              | 39.1999               | 7.1211               |
| D2(eq.) + ROTI-AIUB | 32.5886              | 7.3825              | 38.4102               | 7.0956               |
